# Supplementary material
Source: Springer Nature journal article supplement (https://www.springermedizin.de/resource/supplementary/12962_2003_9_MOESM1_ESM.pdf/9571954)

Full Health

A

B

A

B

A

B

Scenario 1

Scenario 2

Scenario 3

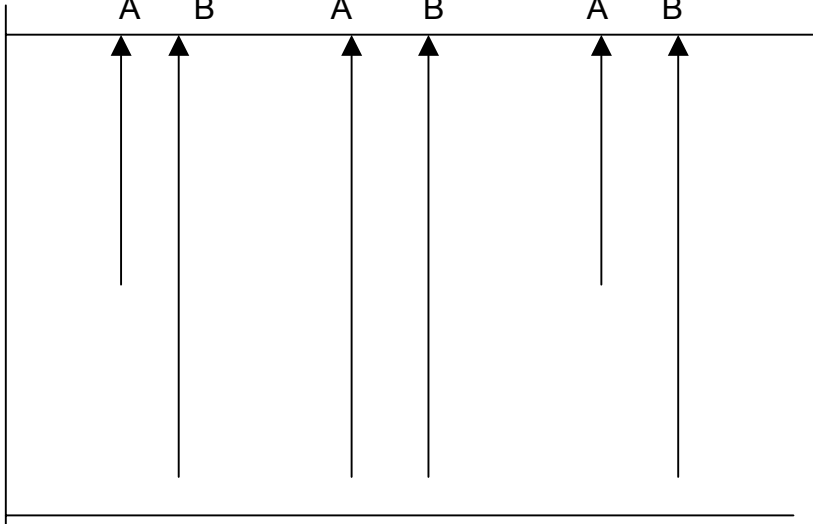

Supplement: MOESM1 [file 9571954]
